# Supplementary material for: Temperature- and Nutrients-Induced Phenotypic Changes of Antarctic Green Snow Bacteria Probed by High-Throughput FTIR Spectroscopy
Source: MDPI journal article supplement (doi:10.3390/biology11060890), 2022-06-09
Supplement: s1 [file s1]

**Table S1.** Cultivation time of green snow bacteria at different temperature and nutrient conditions (gray color indicates the absence or very little growth with the growth ability score lower than 4).

| Sample                 | Cultivation time in days |     |     |     |     |      |     |     |     |     |      |     |     |     |     |      |     |     |     |     |
|------------------------|--------------------------|-----|-----|-----|-----|------|-----|-----|-----|-----|------|-----|-----|-----|-----|------|-----|-----|-----|-----|
|                        | 4°C                      |     |     |     |     | 10°C |     |     |     |     | 18°C |     |     |     |     | 25°C |     |     |     |     |
|                        | BHI                      | MGU | MGY | XGU | XGY | BHI  | MGU | MGY | XGU | XGY | BHI  | MGU | MGY | XGU | XGY | BHI  | MGU | MGY | XGU | XGY |
| <i>Arthrobacter</i>    |                          |     |     |     |     |      |     |     |     |     |      |     |     |     |     |      |     |     |     |     |
| BIM B-1627             | 7                        | 12  | 12  | 12  | 12  | 4    | 7   | 7   | 7   | 7   | 4    | 8   | 8   | 8   | 8   | 7    |     |     |     |     |
| BIM B-1663             | 7                        |     |     |     |     | 4    | 7   | 7   | 7   | 7   | 4    | 8   | 8   | 8   | 8   | 7    | 9   | 9   | 9   | 9   |
| BIM B-1624             | 7                        | 12  | 12  | 12  | 12  | 4    | 7   | 7   | 7   | 7   | 4    | 8   | 8   | 8   | 8   | 7    | 9   | 9   | 9   | 9   |
| BIM B-1625             | 7                        | 12  | 12  | 12  | 12  | 4    | 7   | 7   | 7   | 7   | 4    | 8   | 8   | 8   | 8   | 7    | 9   | 9   | 9   | 9   |
| BIM B-1626             | 7                        | 12  | 12  | 12  | 12  | 4    | 7   | 7   | 7   | 7   | 4    | 8   | 8   | 8   | 8   | 7    | 9   | 9   | 9   | 9   |
| BIM B-1628             | 7                        | 12  | 12  | 12  | 12  | 4    | 7   | 7   | 7   | 7   | 4    | 8   | 8   | 8   | 8   | 7    | 9   | 9   | 9   | 9   |
| BIM B-1664             | 7                        | 12  | 12  | 12  | 12  | 4    | 7   | 7   | 7   | 7   | 4    | 8   | 8   | 8   | 8   | 7    | 9   | 9   | 9   | 9   |
| BIM B-1666             | 7                        | 12  | 12  | 12  | 12  | 4    | 7   | 7   | 7   | 7   | 4    | 8   | 8   | 8   | 8   | 7    |     |     |     |     |
| BIM B-1656             | 7                        | 12  | 12  | 12  | 12  | 4    | 7   | 7   | 7   | 7   | 4    | 8   | 8   | 8   | 8   | 7    | 9   | 9   | 9   | 9   |
| <i>Cryobacterium</i>   |                          |     |     |     |     |      |     |     |     |     |      |     |     |     |     |      |     |     |     |     |
| BIM B-1619             | 10                       |     |     |     |     | 7    |     |     |     |     | 4    |     |     |     |     | 7    |     |     |     |     |
| BIM B-1620             | 10                       |     |     |     |     | 7    |     |     |     |     | 4    |     |     |     |     | 7    |     |     |     |     |
| BIM B-1658             | 10                       |     |     |     |     | 7    |     |     |     |     | 4    |     |     |     |     | 7    |     |     |     |     |
| BIM B-1659             | 10                       |     |     |     |     | 7    |     |     |     |     | 4    |     |     |     |     | 7    |     |     |     |     |
| BIM B-1677             | 10                       |     |     |     |     | 7    |     |     |     |     | 4    |     |     |     |     | 7    |     |     |     |     |
| BIM B-1675             | 10                       |     |     |     |     | 7    |     |     |     |     | 4    |     |     |     |     | 7    |     |     |     |     |
| <i>Leifsonia</i>       |                          |     |     |     |     |      |     |     |     |     |      |     |     |     |     |      |     |     |     |     |
| BIM B-1631             | 11                       |     |     |     |     | 9    |     |     |     |     | 5    |     |     |     |     | 9    |     |     |     |     |
| BIM B-1632             | 11                       |     |     |     |     | 9    |     |     |     |     | 5    |     |     |     |     | 9    |     |     |     |     |
| BIM B-1637             | 11                       |     |     |     |     | 9    |     |     |     |     | 5    |     |     |     |     | 9    |     |     |     |     |
| BIM B-1638             | 11                       |     |     |     |     | 9    |     |     |     |     | 5    |     |     |     |     | 9    |     |     |     |     |
| BIM B-1639             | 11                       |     |     |     |     | 9    |     |     |     |     | 5    |     |     |     |     | 9    |     |     |     |     |
| BIM B-1669             | 11                       |     |     |     |     | 9    |     |     |     |     | 5    |     |     |     |     | 9    |     |     |     |     |
| BIM B-1671             | 11                       | 11  | 11  | 11  | 11  | 9    | 9   | 9   | 9   | 9   | 5    | 10  | 10  | 10  | 10  | 9    |     |     |     |     |
| BIM B-1633             | 11                       |     |     |     |     | 9    |     |     |     |     | 5    |     |     |     |     | 9    |     |     |     |     |
| BIM B-1622             | 11                       |     |     |     |     | 9    |     |     |     |     | 5    |     |     |     |     | 9    |     |     |     |     |
| BIM B-1623             | 11                       |     |     |     |     | 9    |     |     |     |     | 5    |     |     |     |     | 9    |     |     |     |     |
| BIM B-1634             |                          |     |     |     |     | 9    |     |     |     |     | 5    |     |     |     |     | 9    |     |     |     |     |
| <i>Salinibacterium</i> |                          |     |     |     |     |      |     |     |     |     |      |     |     |     |     |      |     |     |     |     |
| BIM B-1630             |                          |     |     |     |     |      |     |     |     |     | 5    |     |     |     |     | 9    |     |     |     |     |
| BIM B-1636             |                          |     |     |     |     | 9    |     |     |     |     | 5    |     |     |     |     | 9    |     |     |     |     |
| BIM B-1654             | 11                       |     |     |     |     | 9    |     |     |     |     | 5    |     |     |     |     | 9    |     |     |     |     |
| BIM B-1665             |                          |     |     |     |     | 9    |     |     |     |     | 5    |     |     |     |     | 9    |     |     |     |     |

|                             |    |    |    |    |    |    |    |    |    |    |    |   |   |   |   |   |   |   |   |   |
|-----------------------------|----|----|----|----|----|----|----|----|----|----|----|---|---|---|---|---|---|---|---|---|
| <i>Rhodococcus</i>          |    |    |    |    |    |    |    |    |    |    |    |   |   |   |   |   |   |   |   |   |
| BIM B-1621                  | 11 |    |    |    |    | 9  |    |    |    |    | 3  |   |   |   |   | 5 |   |   |   |   |
| BIM B-1670                  | 11 | 12 | 12 | 12 | 12 | 9  | 10 | 10 | 10 | 10 | 3  | 8 | 8 | 8 | 8 | 5 | 9 | 9 | 9 | 9 |
| BIM B-1660                  | 7  | 12 | 12 | 12 | 12 | 5  | 6  | 6  | 6  | 6  | 3  | 7 | 7 | 7 | 7 | 3 | 5 | 5 | 5 | 5 |
| BIM B-1661                  | 7  | 12 | 12 | 12 | 12 | 5  | 6  | 6  | 6  | 6  | 3  | 7 | 7 | 7 | 7 | 3 | 5 | 5 | 5 | 5 |
| <i>Paeniglutamicibacter</i> |    |    |    |    |    |    |    |    |    |    |    |   |   |   |   |   |   |   |   |   |
| BIM B-1657                  | 10 |    |    |    |    | 7  |    |    |    |    | 4  |   |   |   |   | 6 |   |   |   |   |
| <i>Polaromonas</i>          |    |    |    |    |    |    |    |    |    |    |    |   |   |   |   |   |   |   |   |   |
| BIM B-1676                  | 11 |    |    |    |    | 10 |    |    |    |    | 10 |   |   |   |   |   |   |   |   |   |
| <i>Pseudomonas</i>          |    |    |    |    |    |    |    |    |    |    |    |   |   |   |   |   |   |   |   |   |
| BIM B-1668                  | 7  | 9  | 9  | 9  | 9  | 4  | 6  | 6  | 6  | 6  | 3  | 4 | 4 | 4 | 4 | 3 | 3 | 3 | 3 | 3 |
| BIM B-1672                  | 7  | 8  | 8  | 8  | 8  | 4  | 5  | 5  | 5  | 5  | 3  | 4 | 4 | 4 | 4 | 3 | 3 | 3 | 3 | 3 |
| BIM B-1674                  | 7  | 8  | 8  | 8  | 8  | 4  | 5  | 5  | 5  | 5  | 3  | 4 | 4 | 4 | 4 | 3 | 3 | 3 | 3 | 3 |
| BIM B-1667                  | 7  | 9  | 9  | 9  | 9  | 4  | 6  | 6  | 6  | 6  | 3  | 4 | 4 | 4 | 4 | 3 | 3 | 3 | 3 | 3 |
| BIM B-1635                  | 10 |    |    |    |    | 4  |    |    |    |    | 3  | 4 | 4 | 4 | 4 | 3 | 3 | 3 | 3 | 3 |
| BIM B-1673                  | 7  | 8  | 8  | 8  | 8  | 4  | 5  | 5  | 5  | 5  | 3  | 4 | 4 | 4 | 4 | 3 | 3 | 3 | 3 | 3 |
| <i>Psychrobacter</i>        |    |    |    |    |    |    |    |    |    |    |    |   |   |   |   |   |   |   |   |   |
| BIM B-1629                  | 11 |    |    |    |    | 9  |    |    |    |    | 3  |   |   |   |   |   |   |   |   |   |
| BIM B-1655                  | 11 |    |    |    |    | 9  |    |    |    |    | 3  |   |   |   |   | 9 |   |   |   |   |
| BIM B-1662                  | 11 |    |    |    |    | 9  |    |    |    |    | 3  |   |   |   |   | 9 |   |   |   |   |
